# Supplementary material for: Semi-Synthesis of Different Pyranoflavonoid Backbones and the Neurogenic Potential
Source: MDPI journal article supplement (doi:10.3390/molecules28104023), 2023-05-11

## Supporting Information

# Semi-Synthesis of Different Pyranoflavonoid Backbones and the Neurogenic Potential

Corinna Urmann <sup>1,2,\*</sup>, Lara Bieler <sup>3,4</sup>, Michael Hackl <sup>2</sup>, Olivia Chia-Leeson <sup>2</sup>,  
Sebastien Couillard-Despres <sup>3,4</sup> and Herbert Riepl <sup>1,2,\*</sup>

<sup>1</sup> Organic-Analytical Chemistry, Weihenstephan-Triesdorf University of Applied Sciences, 94315 Straubing, Germany

<sup>2</sup> TUM Campus Straubing for Biotechnology and Sustainability, Technical University of Munich, 94315 Straubing, Germany

<sup>3</sup> Institute of Experimental Neuroregeneration, Spinal Cord Injury and Tissue Regeneration Center Salzburg, Paracelsus Medical University Salzburg, 5020 Salzburg, Austria

<sup>4</sup> Austrian Cluster for Tissue Regeneration, 1200 Vienna, Austria

\* Correspondence: corinna.urmann@tum.de (C.U.); herbert.riepl@hswt.de (H.R.)

### Content

|                                             |   |
|---------------------------------------------|---|
| 1. NMR spectra of pyranochalcone (2).....   | 2 |
| 2. NMR spectra of pyranoflavanone (4) ..... | 3 |
| 3. NMR spectra of pyranoflavone (5).....    | 4 |
| 4. NMR spectra of pyranoaurone (6).....     | 6 |
| 5. NMR spectra of pyranoflavonol (7) .....  | 8 |

# Supporting Information -Semi-Synthesis of Different Pyranoflavonoid Backbones and the Neurogenic Potential

## 1. NMR spectra of pyranochalcone (2)

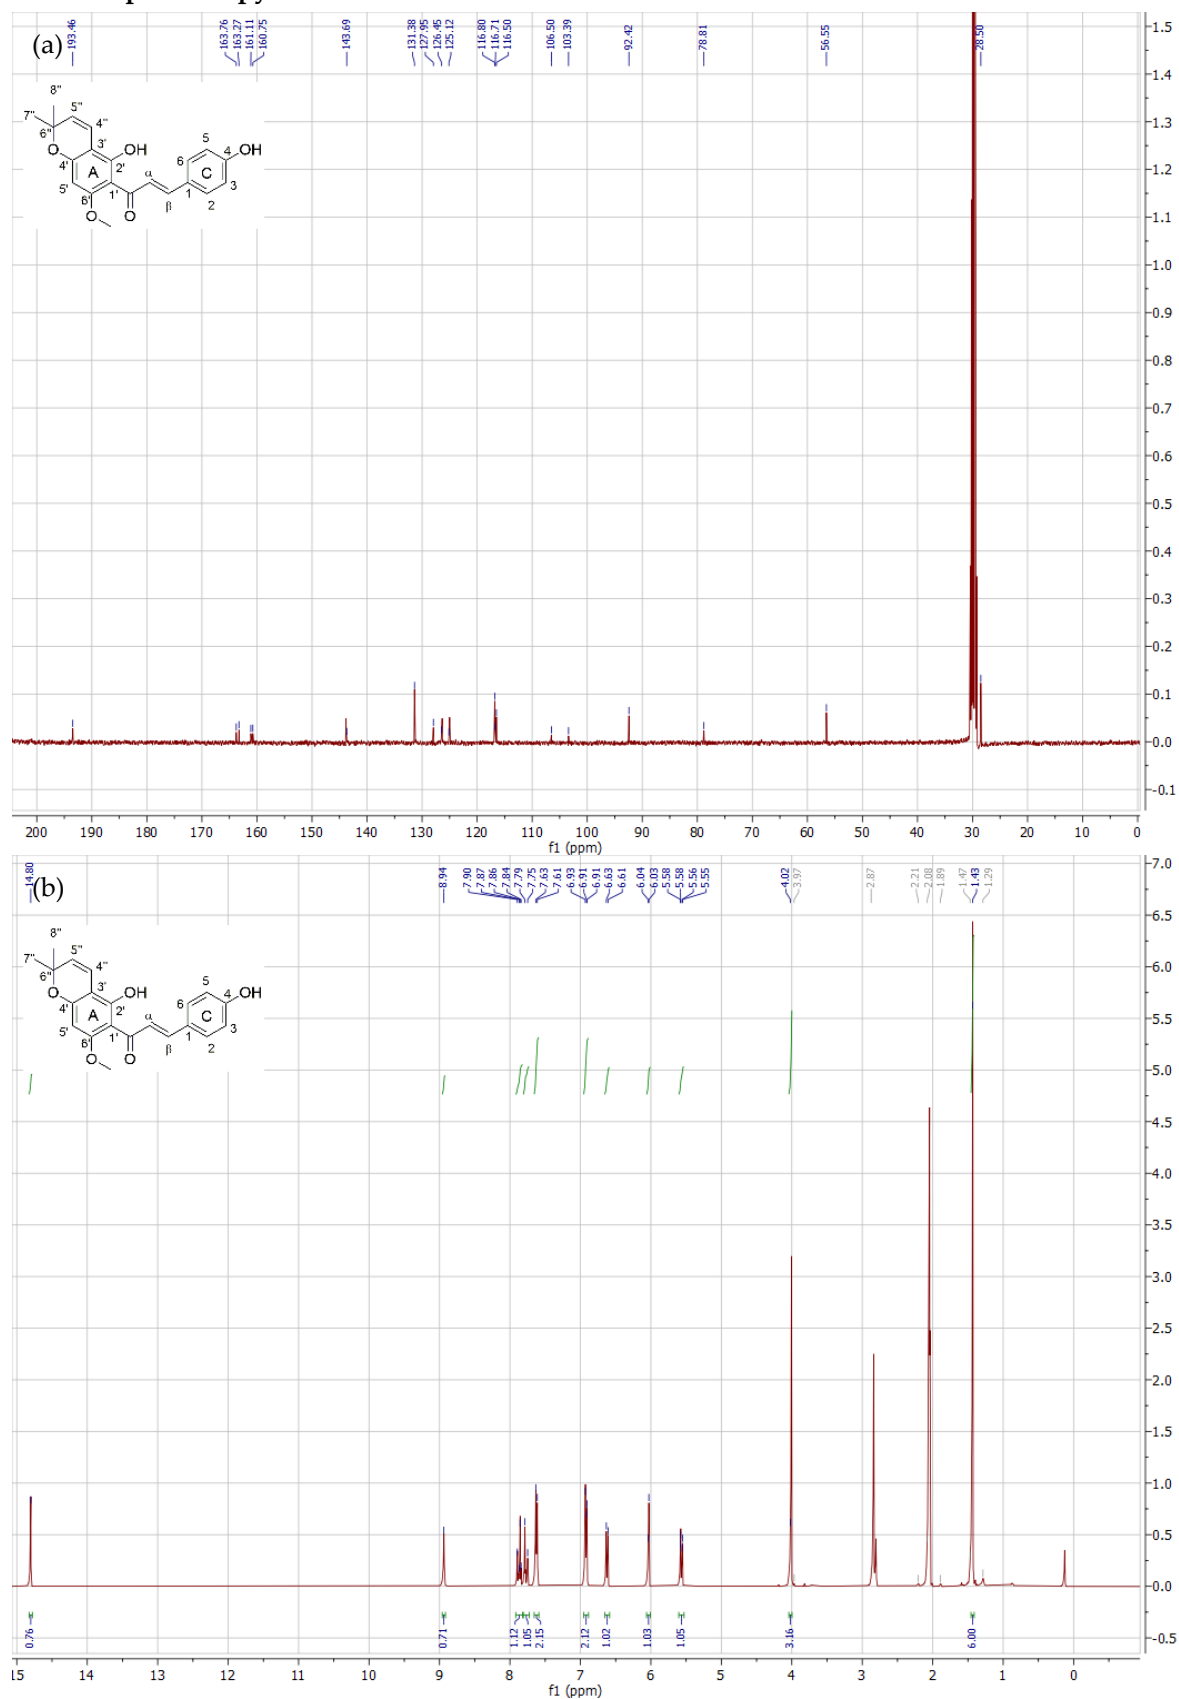

Figure S1. (a)  $^1\text{H}$ -NMR and (b)  $^{13}\text{C}$ -NMR of pyranochalcone (2).

# Supporting Information -Semi-Synthesis of Different Pyranoflavanoid Backbones and the Neurogenic Potential

## 2. NMR spectra of pyranoflavanone (4)

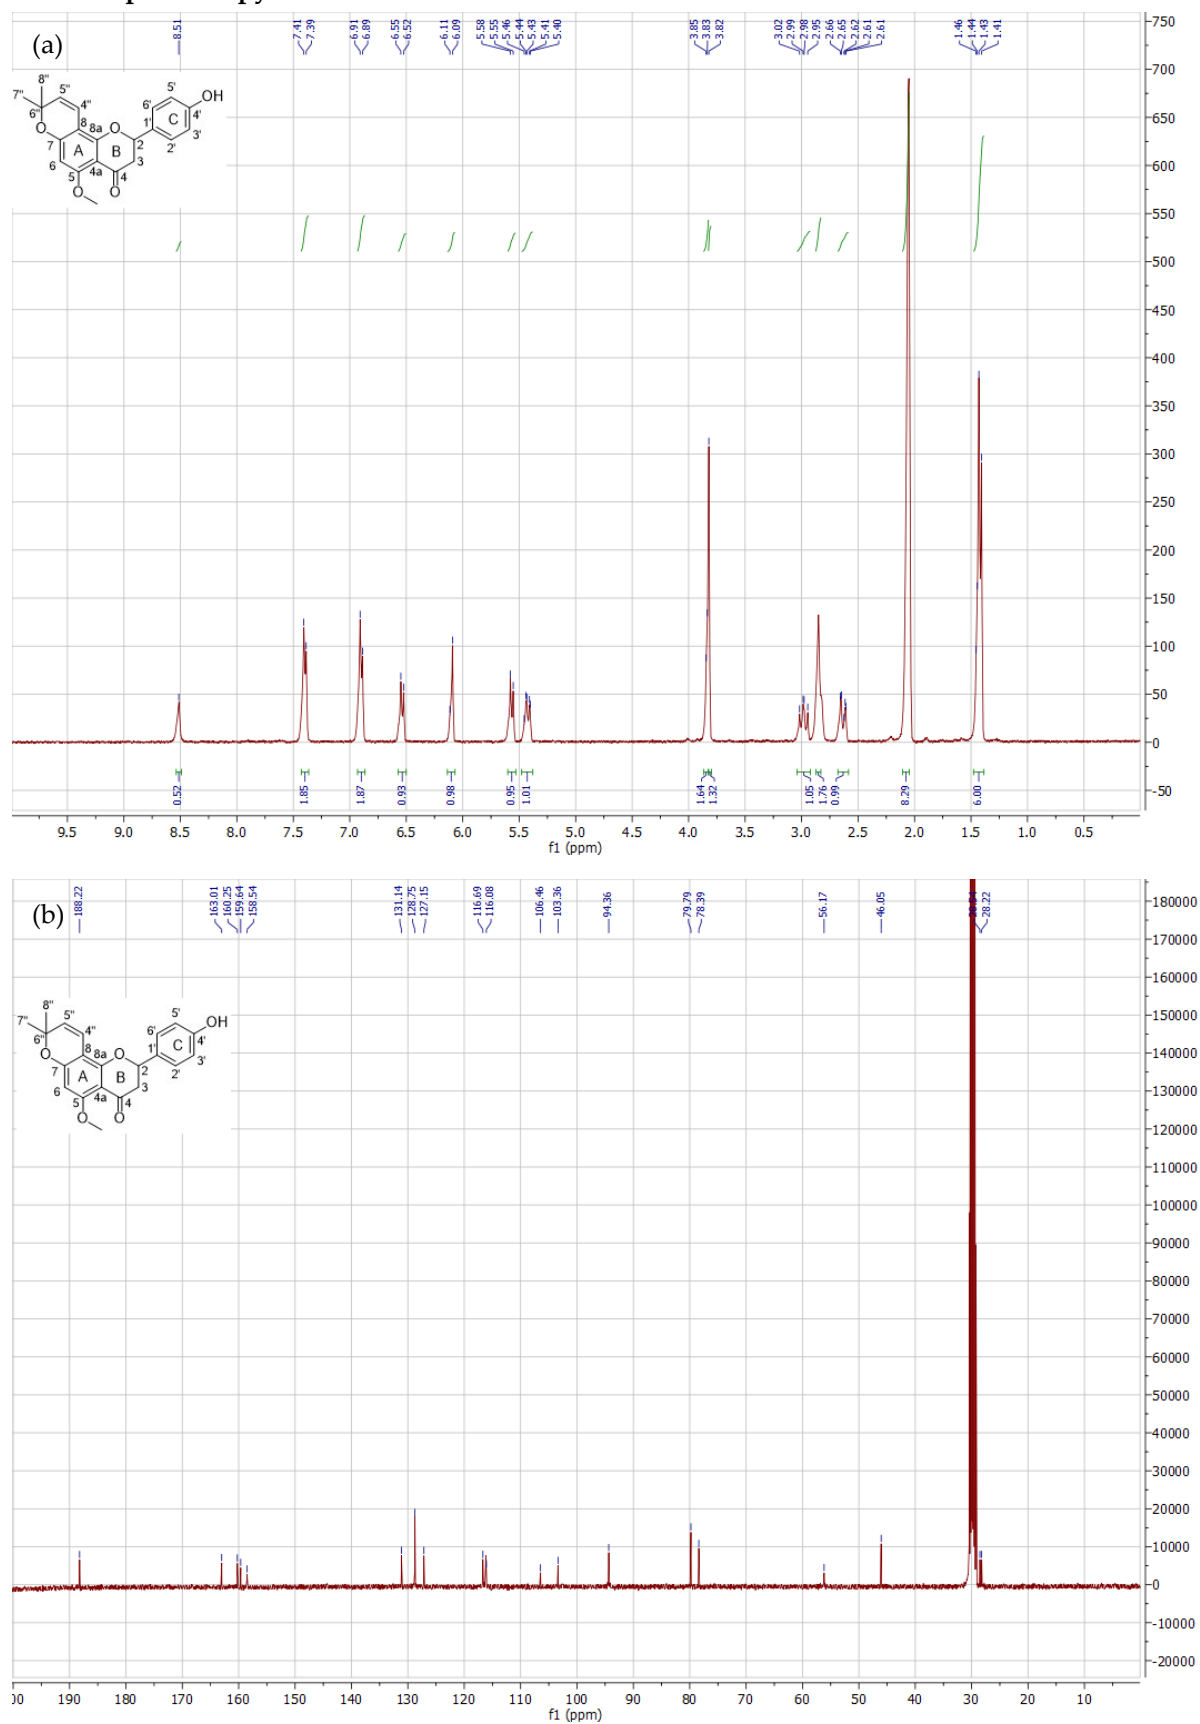

Figure S2. (a)  $^1\text{H}$ -NMR and (b)  $^{13}\text{C}$ -NMR of pyranoflavanone (4).

# Supporting Information -Semi-Synthesis of Different Pyranoflavonoid Backbones and the Neurogenic Potential

## 3. NMR spectra of pyranoflavone (5)

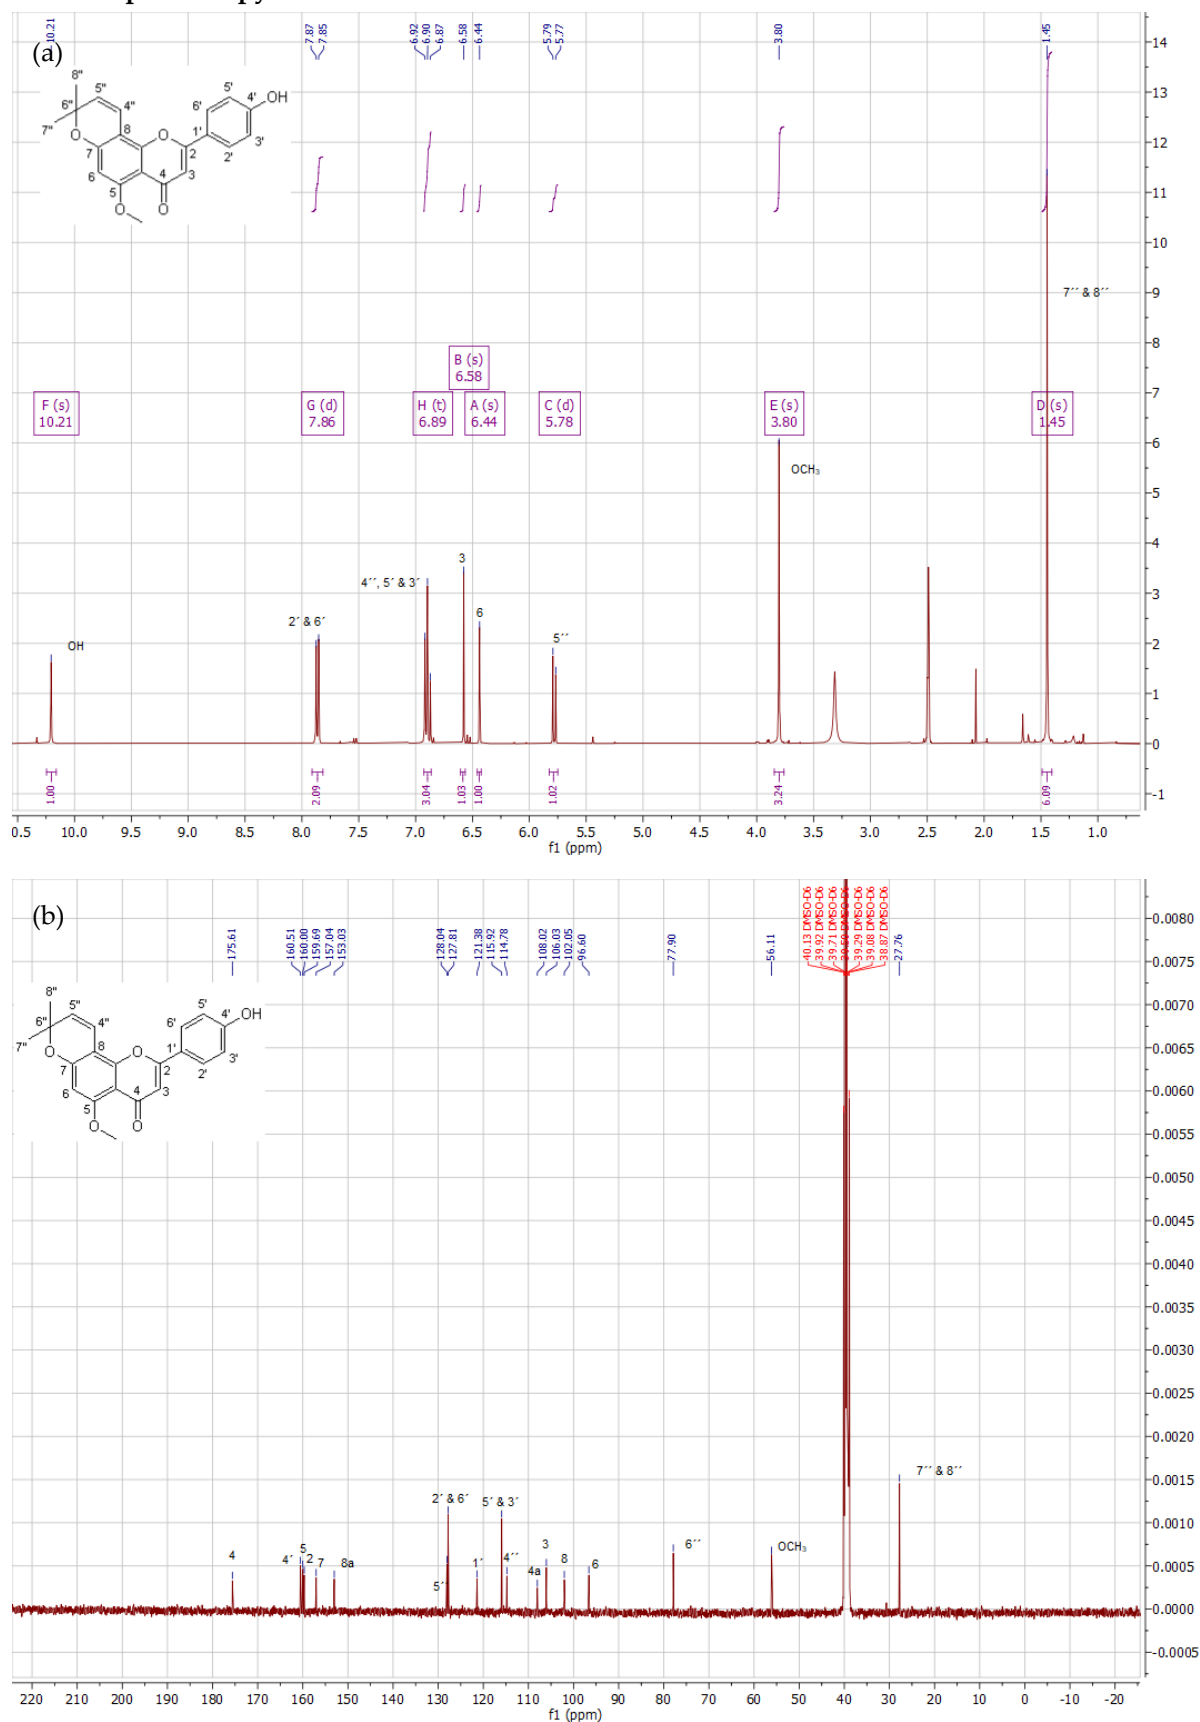

# Supporting Information -Semi-Synthesis of Different Pyranoflavonoid Backbones and the Neurogenic Potential

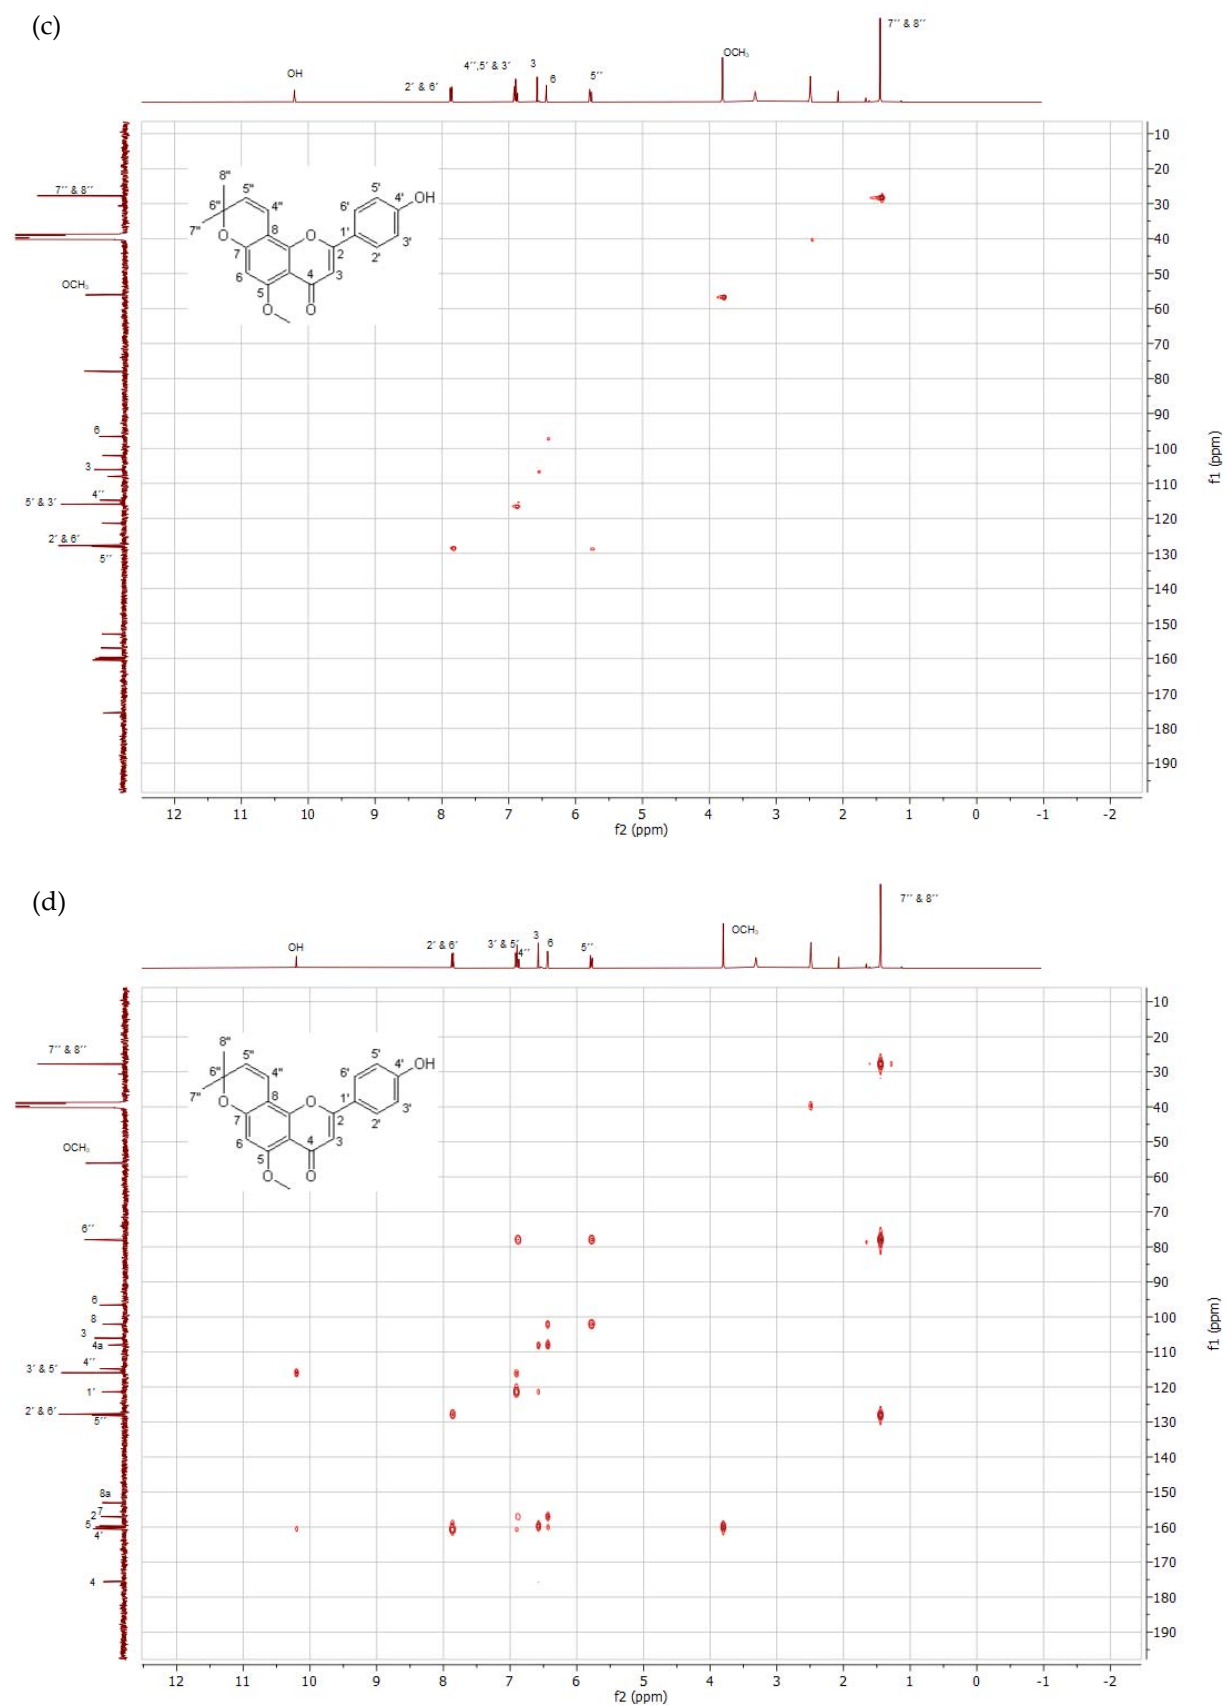

Figure S3. (a)  $^1\text{H}$ -NMR, (b)  $^{13}\text{C}$ -NMR, (c) HSQC and (d) HMBC of pyranoflavone (5).

# Supporting Information -Semi-Synthesis of Different Pyranoflavonoid Backbones and the Neurogenic Potential

## 4. NMR spectra of pyranoaurone (6)

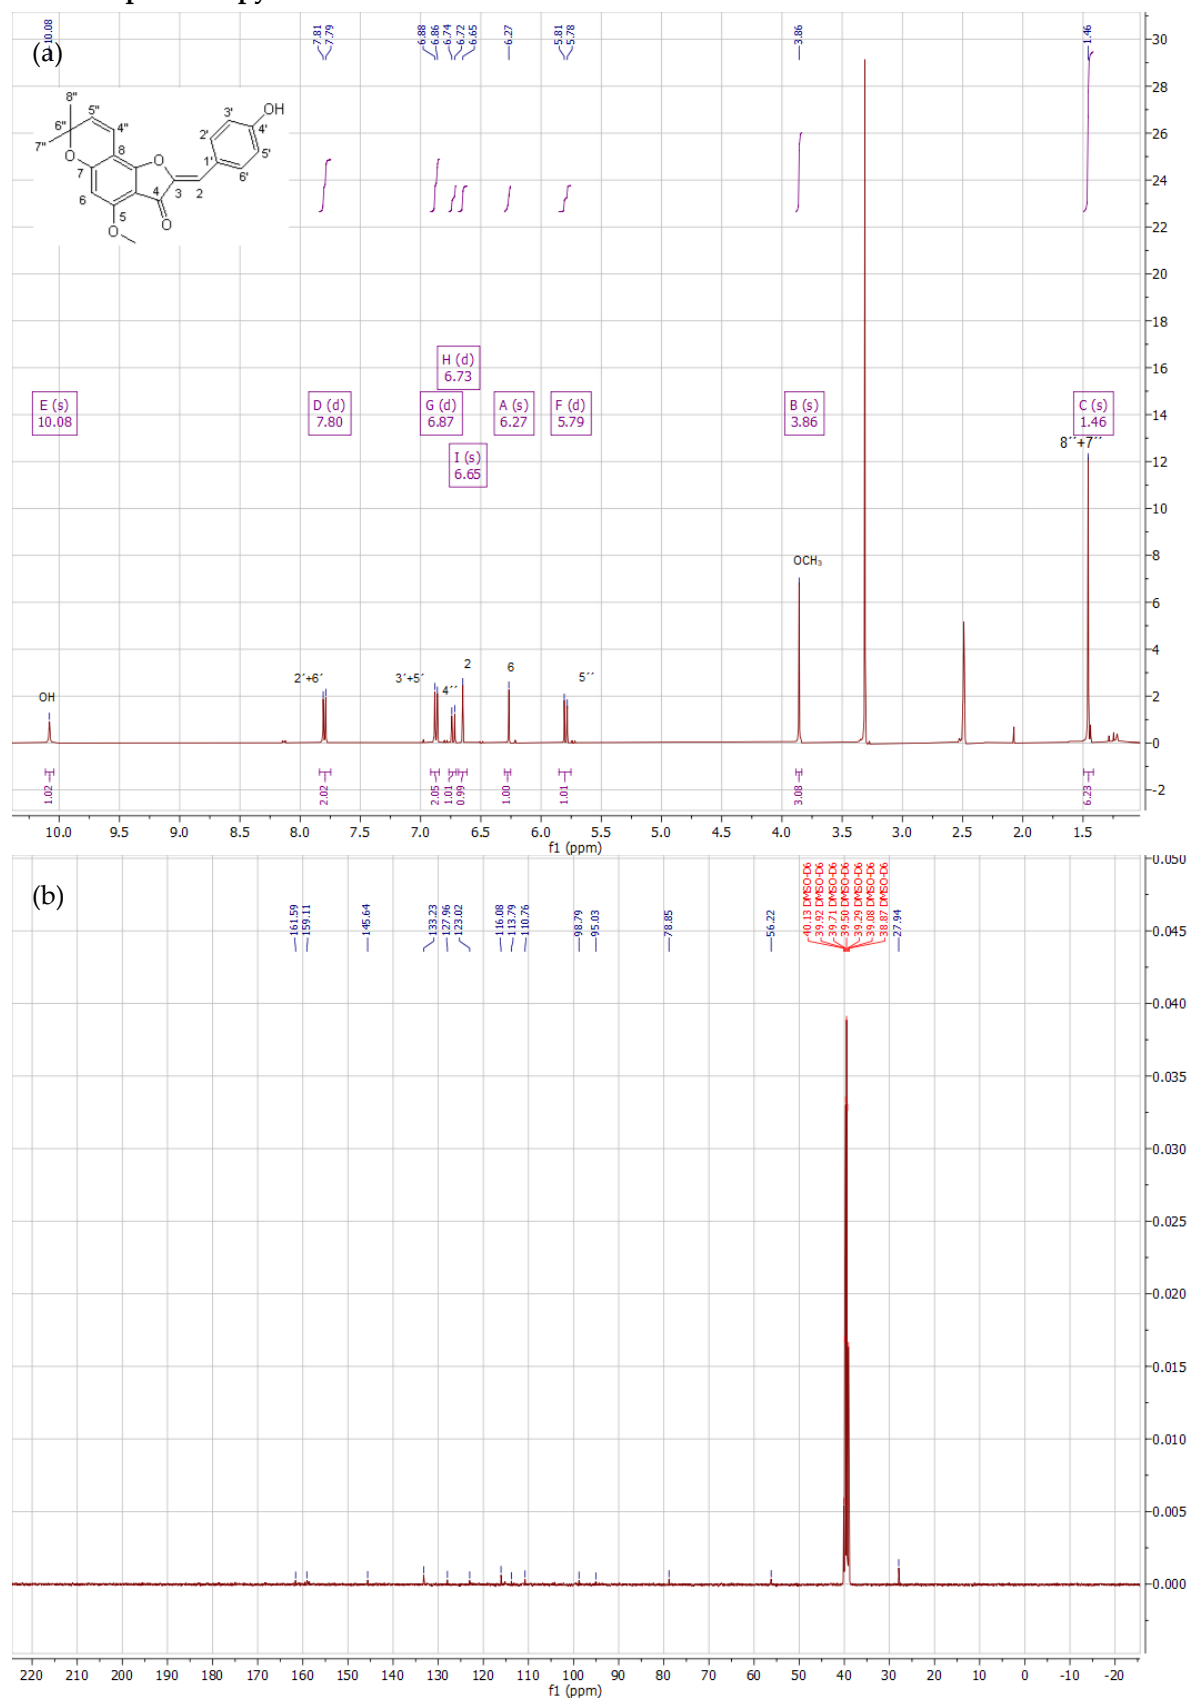

# Supporting Information -Semi-Synthesis of Different Pyranoflavonoid Backbones and the Neurogenic Potential

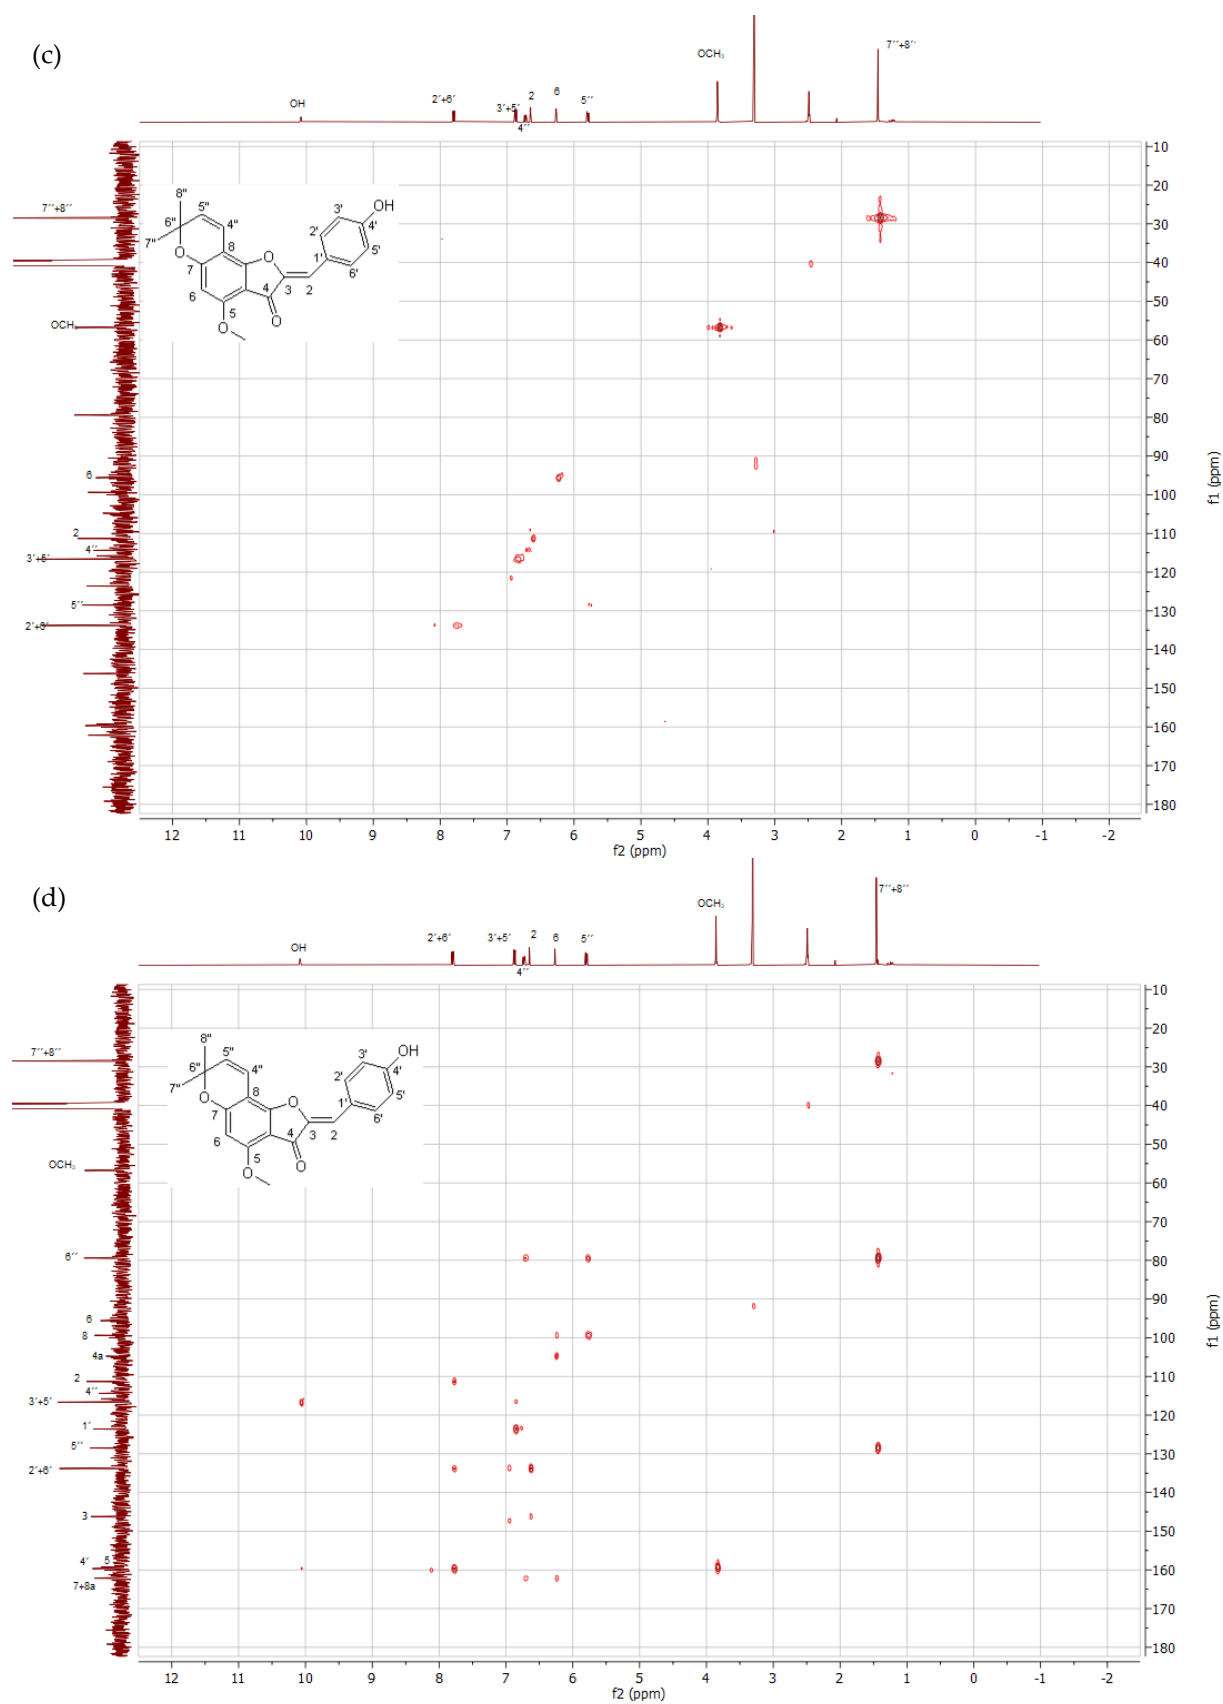

Figure S4. (a)  $^1\text{H}$ -NMR, (b)  $^{13}\text{C}$ -NMR, (c) HSQC and (d) HMBC of pyranoaurone (6).

# Supporting Information -Semi-Synthesis of Different Pyranoflavonoid Backbones and the Neurogenic Potential

## 5. NMR spectra of pyranoflavonol (7)

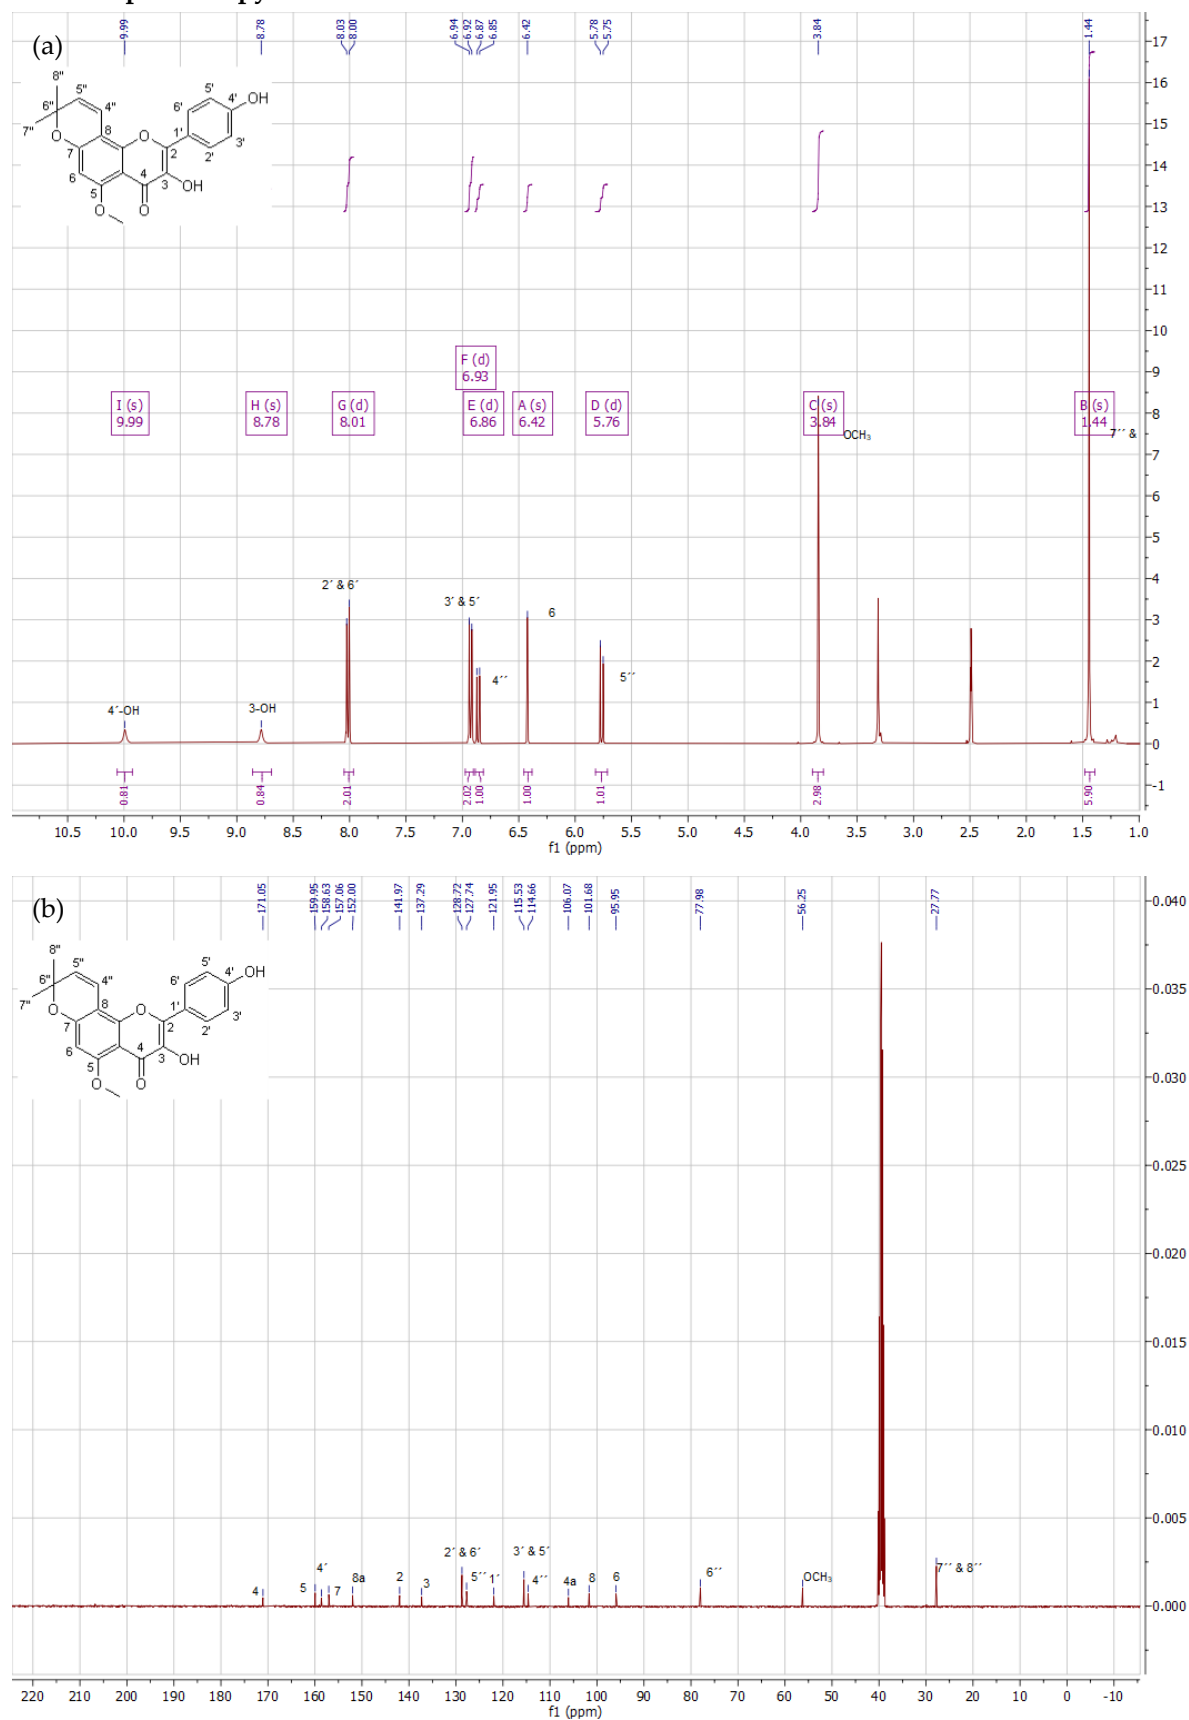

Supporting Information -Semi-Synthesis of Different Pyranoflavonoid Backbones and the Neurogenic Potential

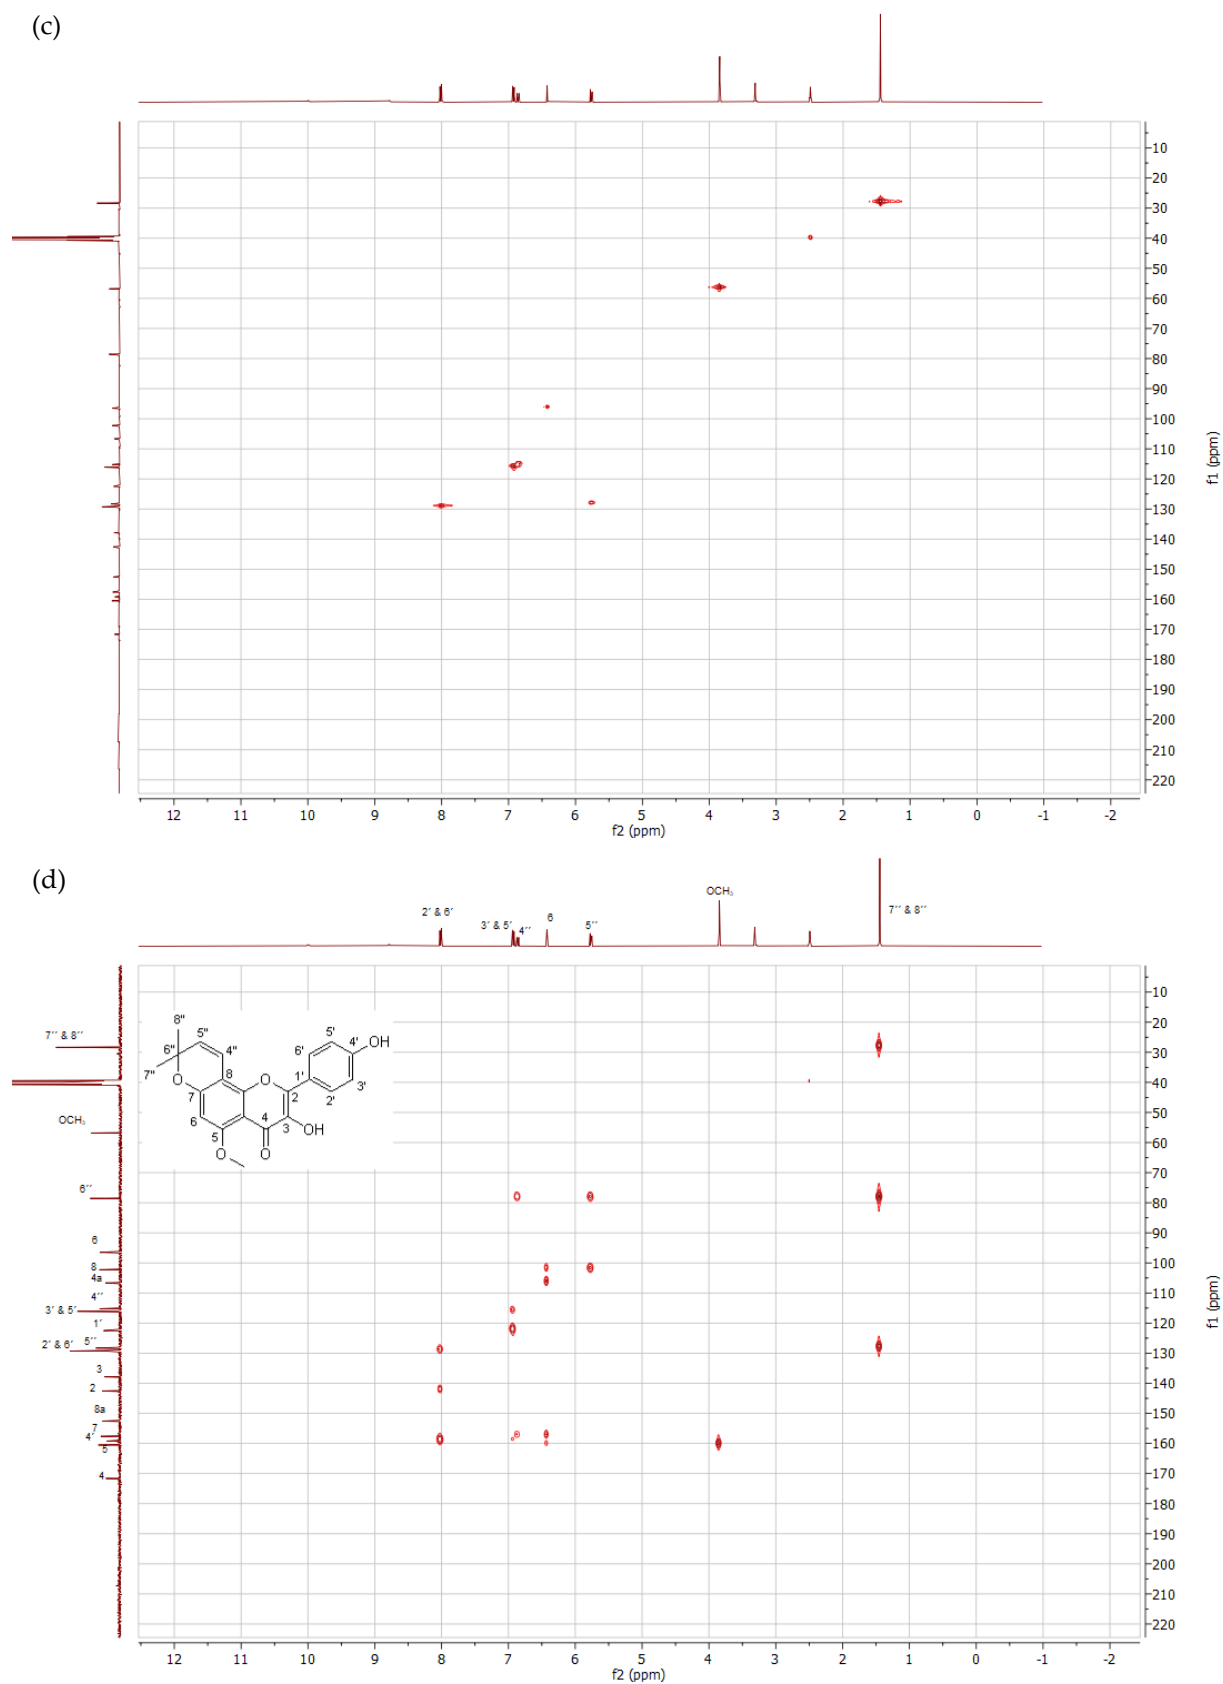

Supplement: s1 [file s1]
